# Supplementary material
Source: Springer Nature journal article supplement (https://www.springermedizin.de/resource/supplementary/12913_2014_3165_MOESM1_ESM.pdf/9532526)
Supplement: MOESM1 [file 9532526]

| Phase   | Months  | Alternate-month design | Prevention program                                                             |
|---------|---------|------------------------|--------------------------------------------------------------------------------|
| Phase 0 | M1-M2   |                        | Off phase (no intervention)                                                    |
| Phase 1 | M3-M6   |                        | A. Standardized triage algorithm and waiting number screen                     |
|         | M7-M10  |                        | B. Clear signage of the premises                                               |
|         | M11-M14 |                        | C. Informational videos for patients and accompanying persons in waiting rooms |
|         | M15-M18 |                        | D. Mediator in waiting rooms                                                   |
|         | M19-M22 |                        | E. Surveillance camera linked to hospital security                             |
| Phase 2 | M23-M24 |                        | Simultaneous interventions A to E                                              |
